# Supplementary material for: Frequency and Pattern of Heteroplasmy in the Complete Human Mitochondrial Genome
Source: PubMed Central journal article supplement (PMC3788774; doi:10.1371/journal.pone.0074636), 2013-10-02

**Supplementary Figure S2.** Implication of mtDNA point heteroplasmies in the secondary structure of tRNAs, rRNAs and tertiary structure of COXI, COXII and CytB

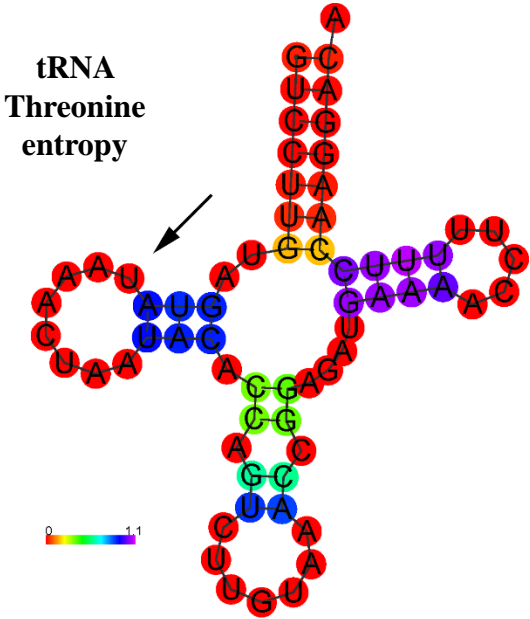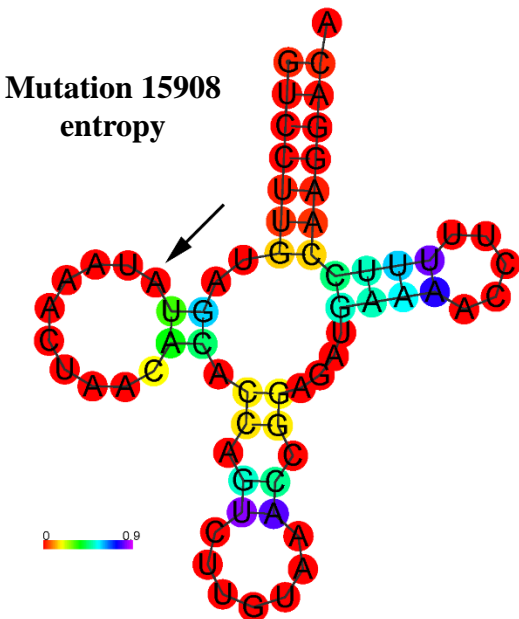

**tRNA  
Phenylalanine**

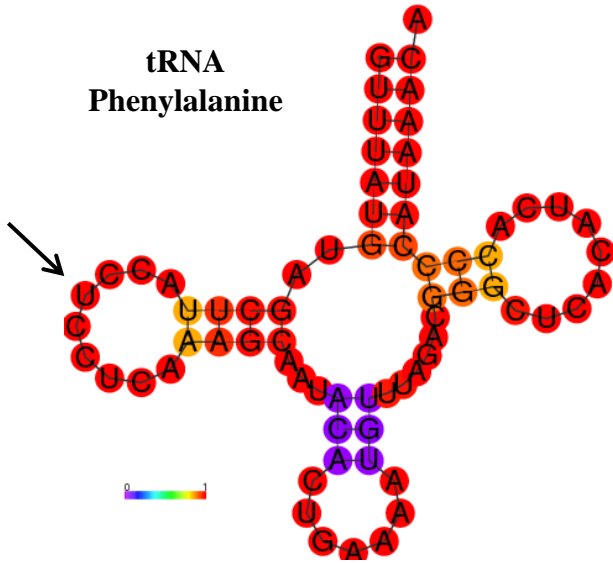

**Mutation 593**

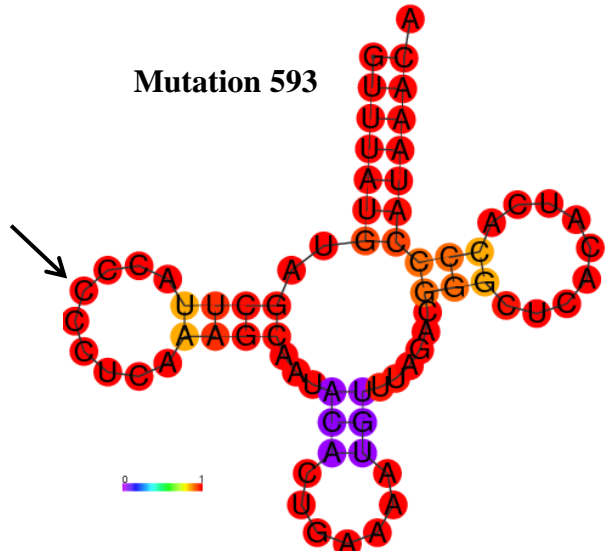

**tRNA  
Phenylalanine  
entropy**

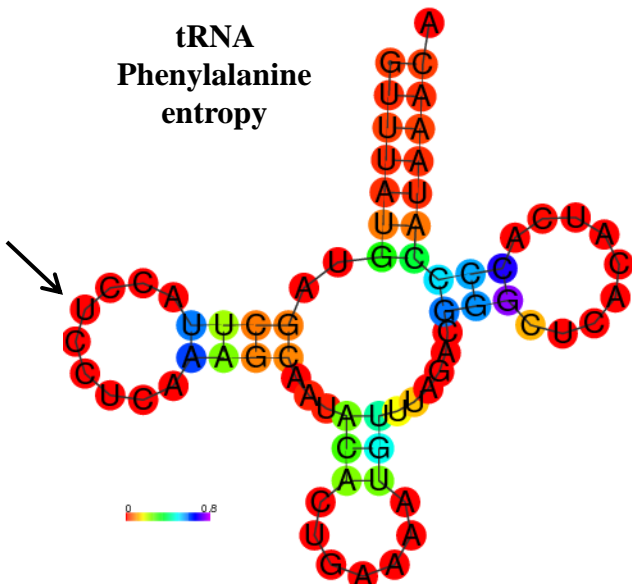

**Mutation 593  
entropy**

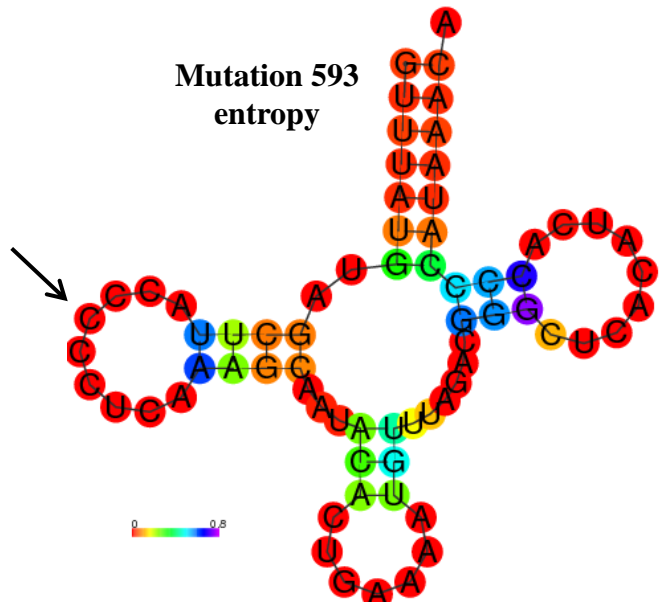

tRNA Lysine

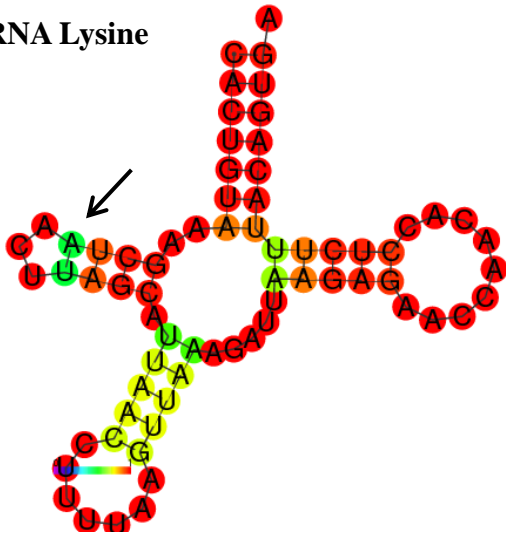

Mutation 8307

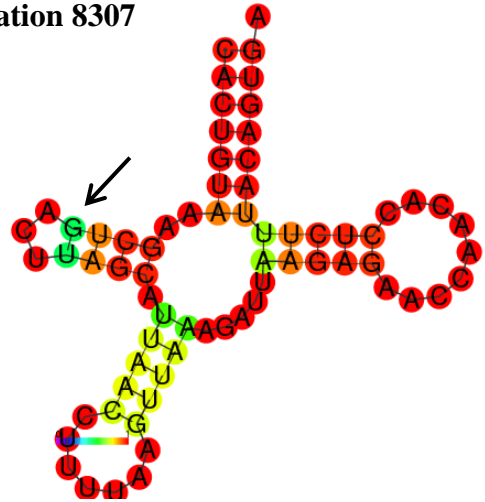

tRNA Lysine entropy

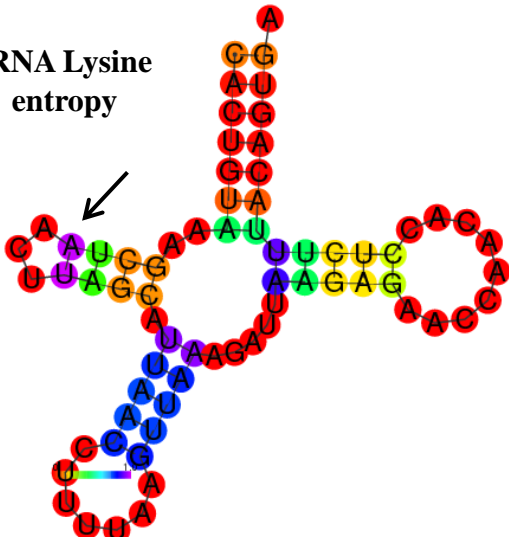

Mutation 8307 entropy

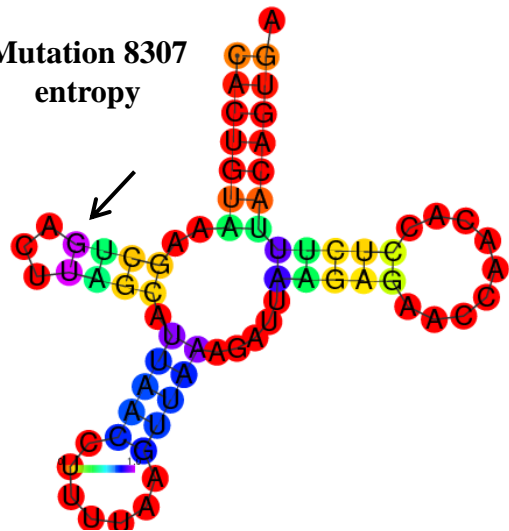

tRNA Arginine

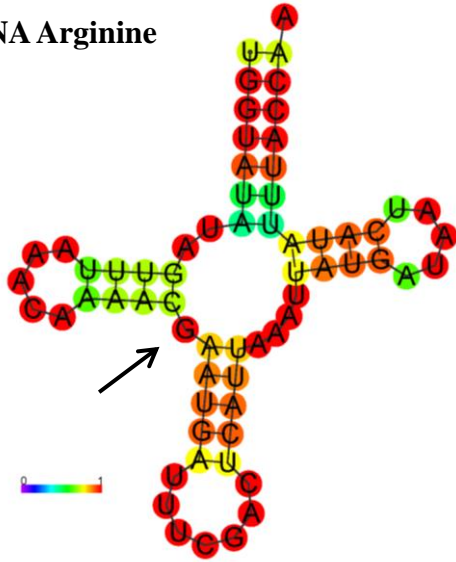

Mutation 10427

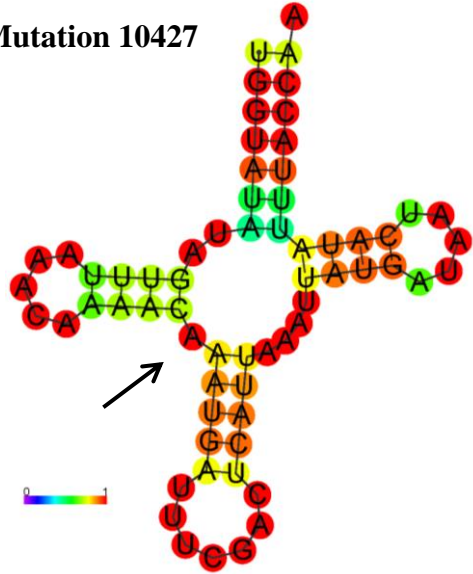

tRNA Arginine  
entropy

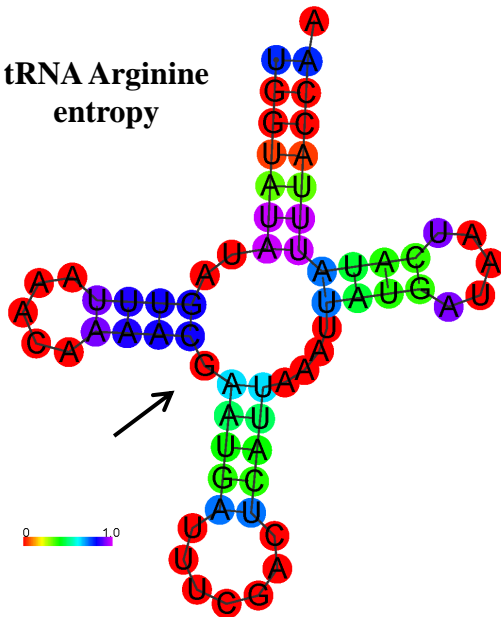

Mutation 10427  
entropy

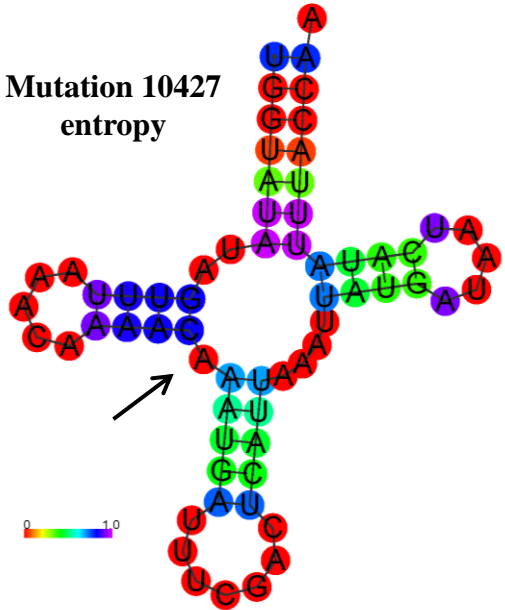

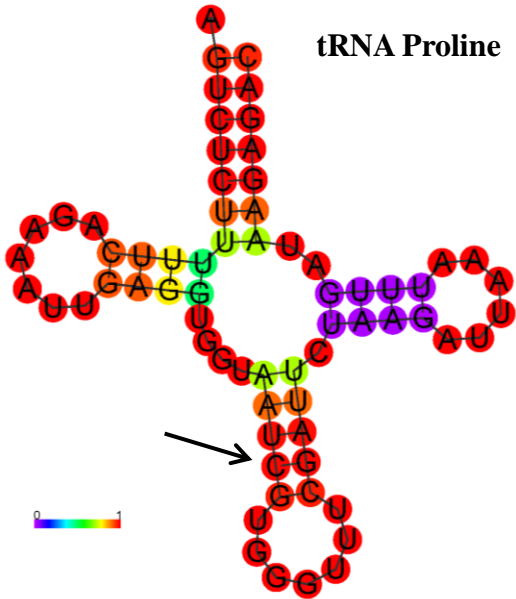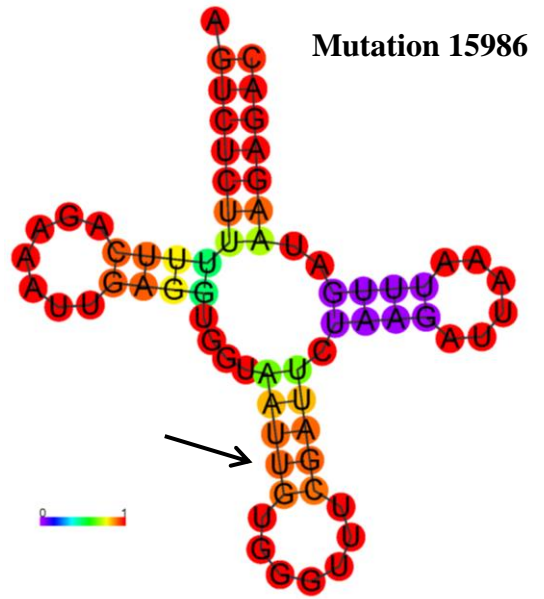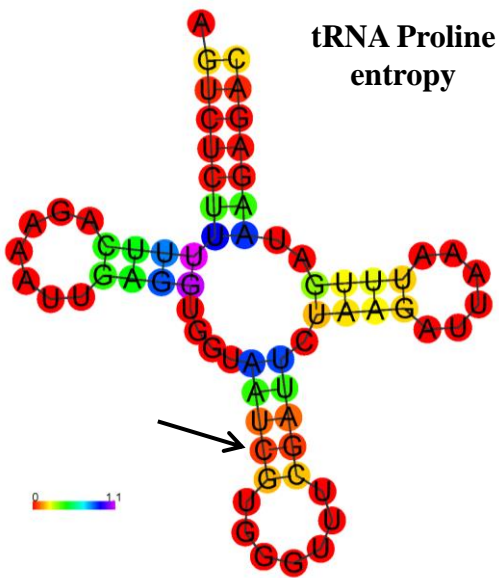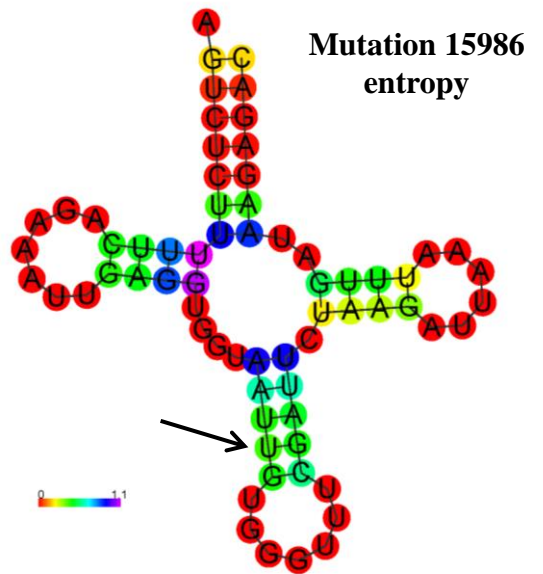

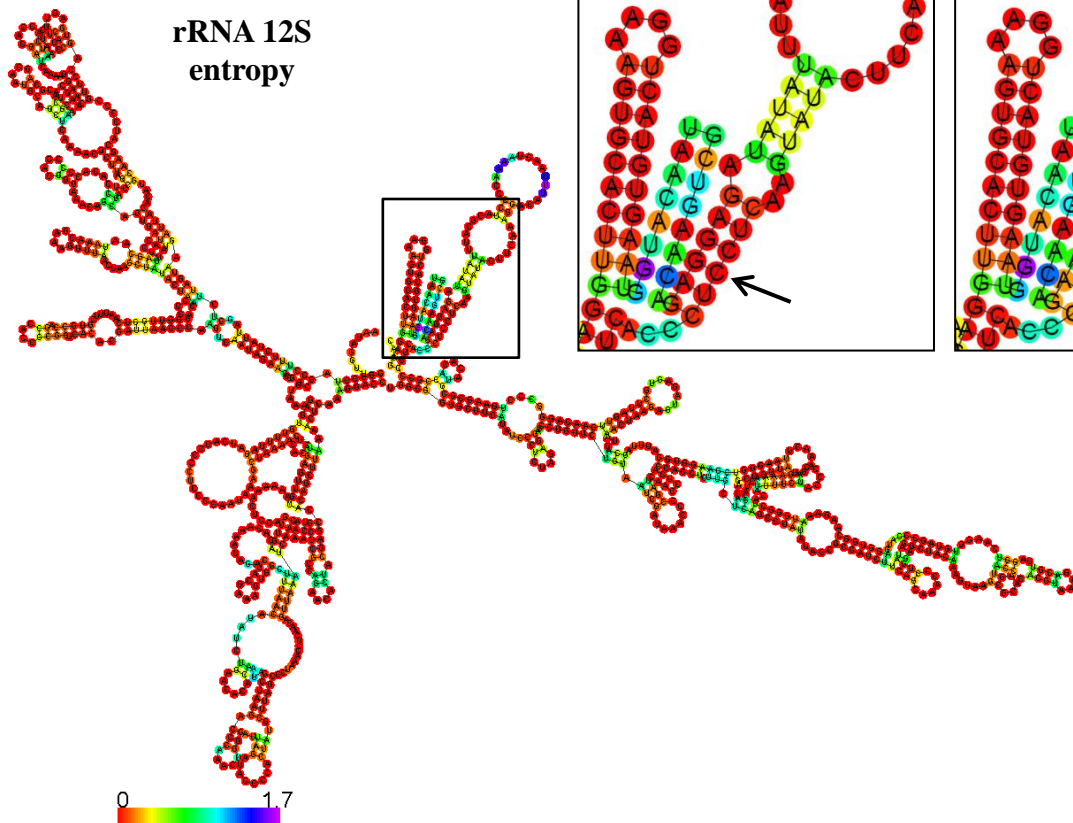

rRNA 16S

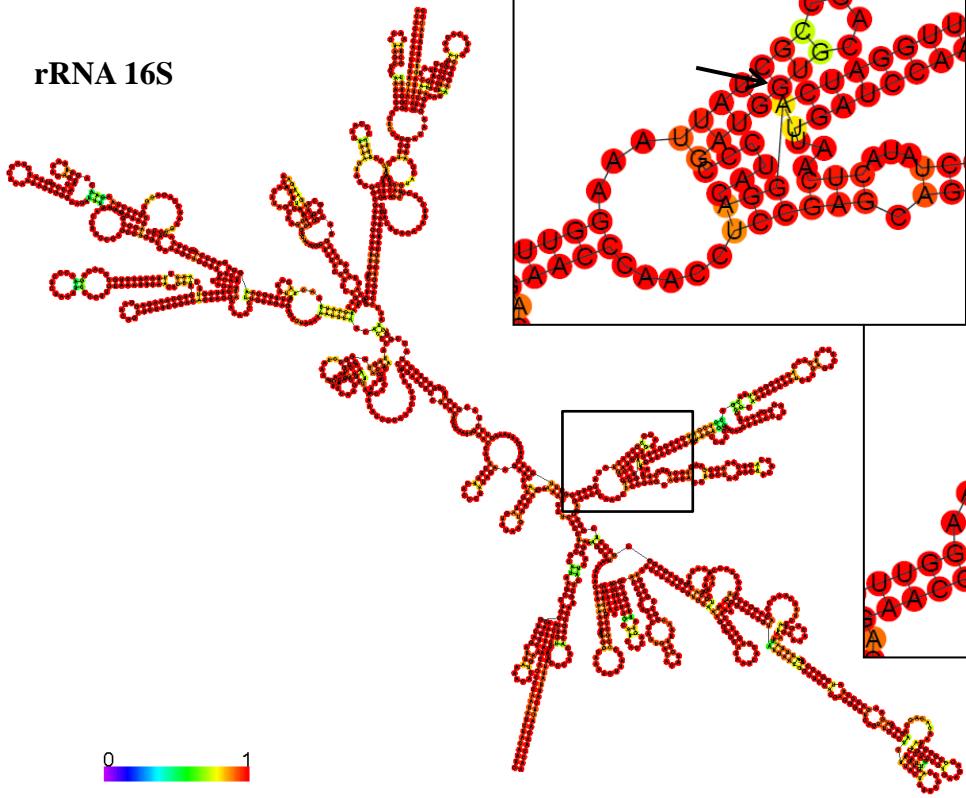

3014 WT

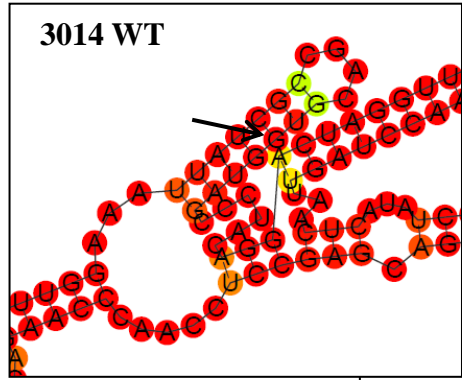

Mutation 3014

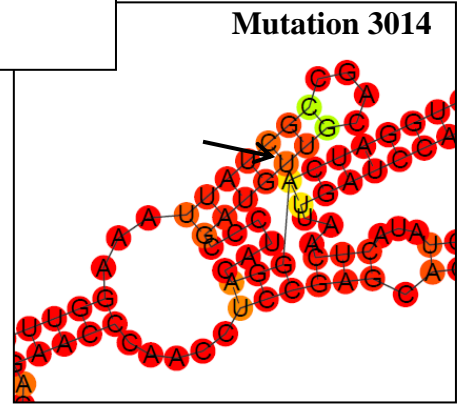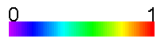

rRNA 16S entropy

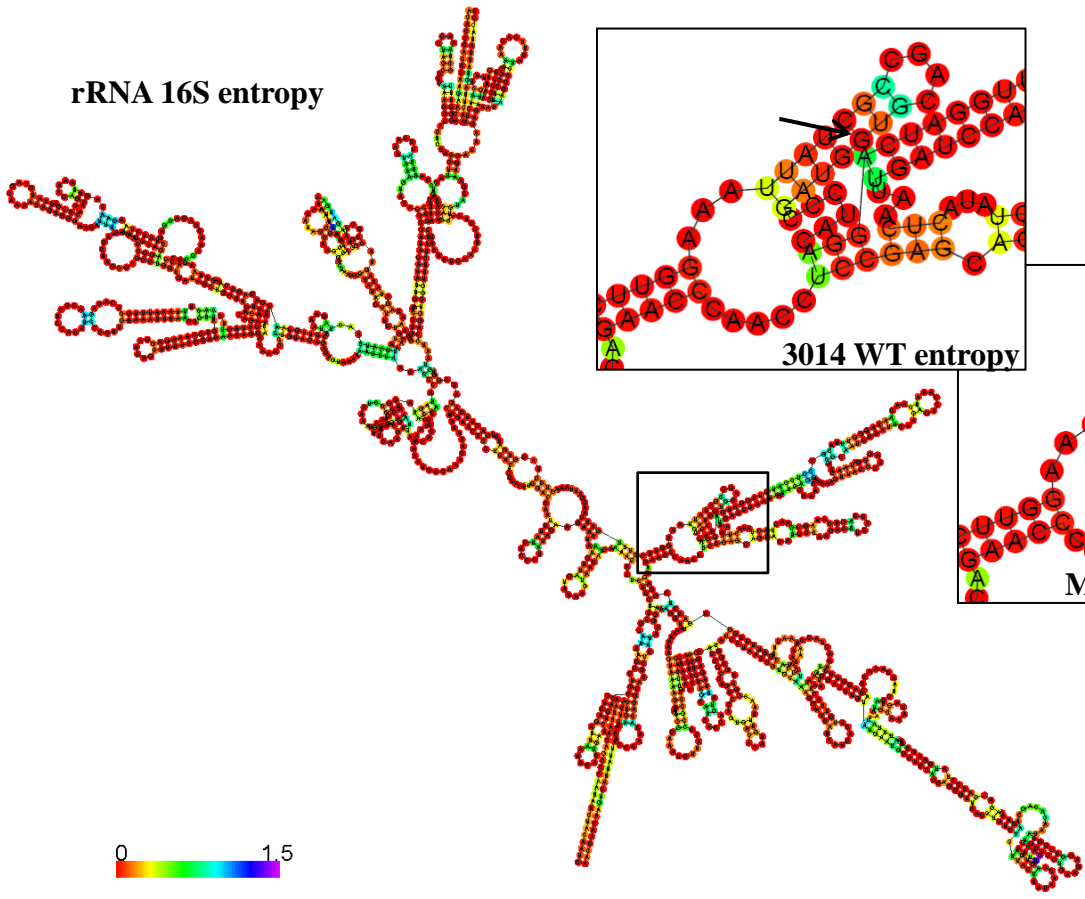

3014 WT entropy

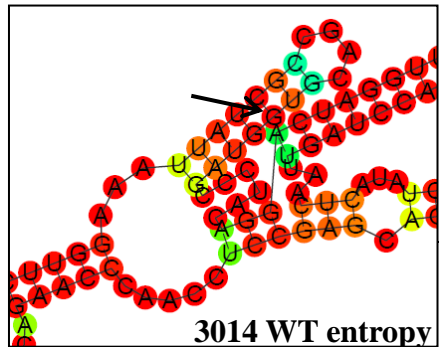

Mutation 3014 entropy

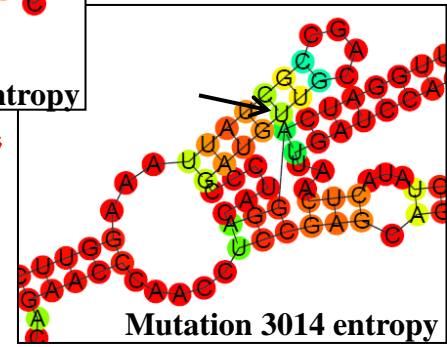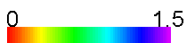

rRNA 16S

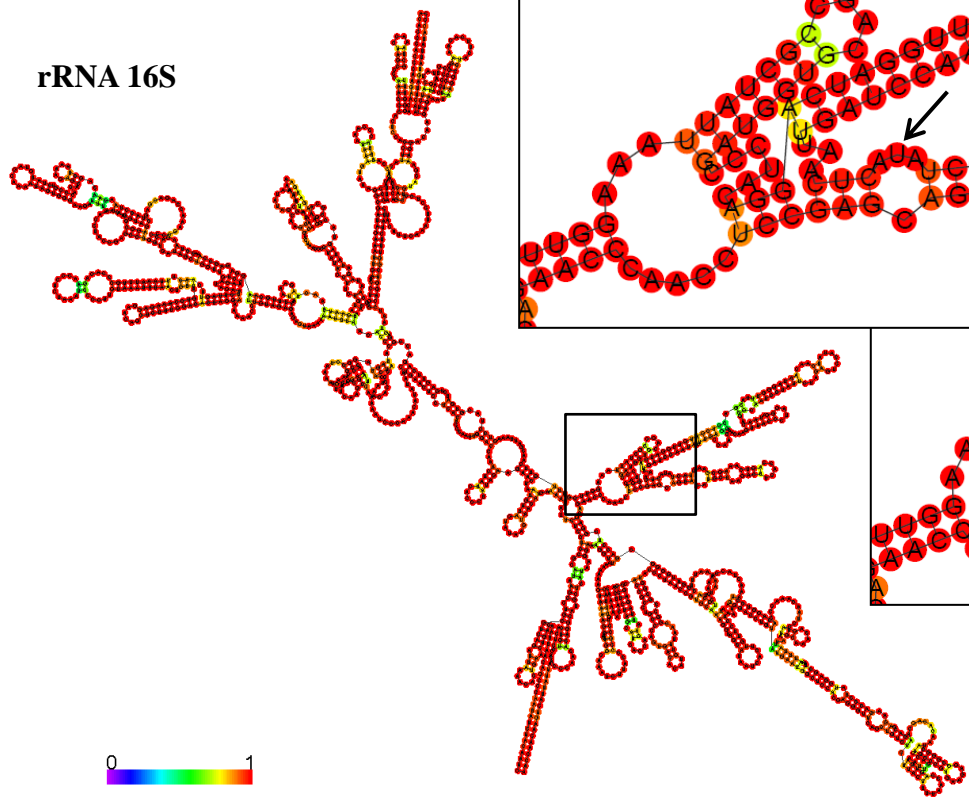

2887 WT

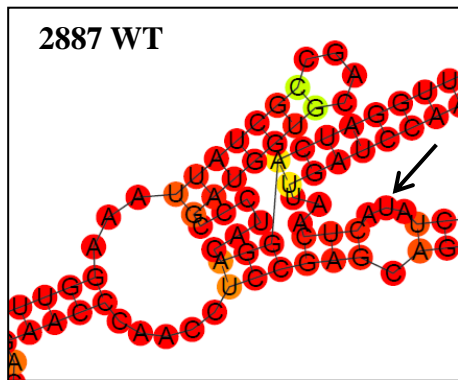

Mutation 2887

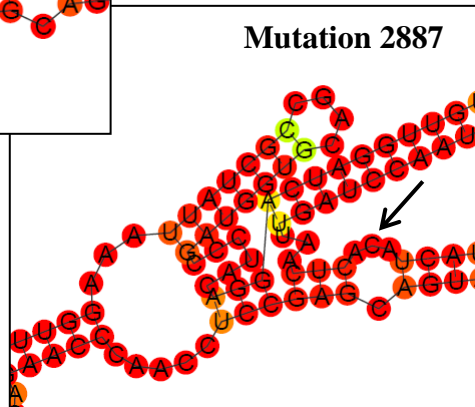

rRNA 16S entropy

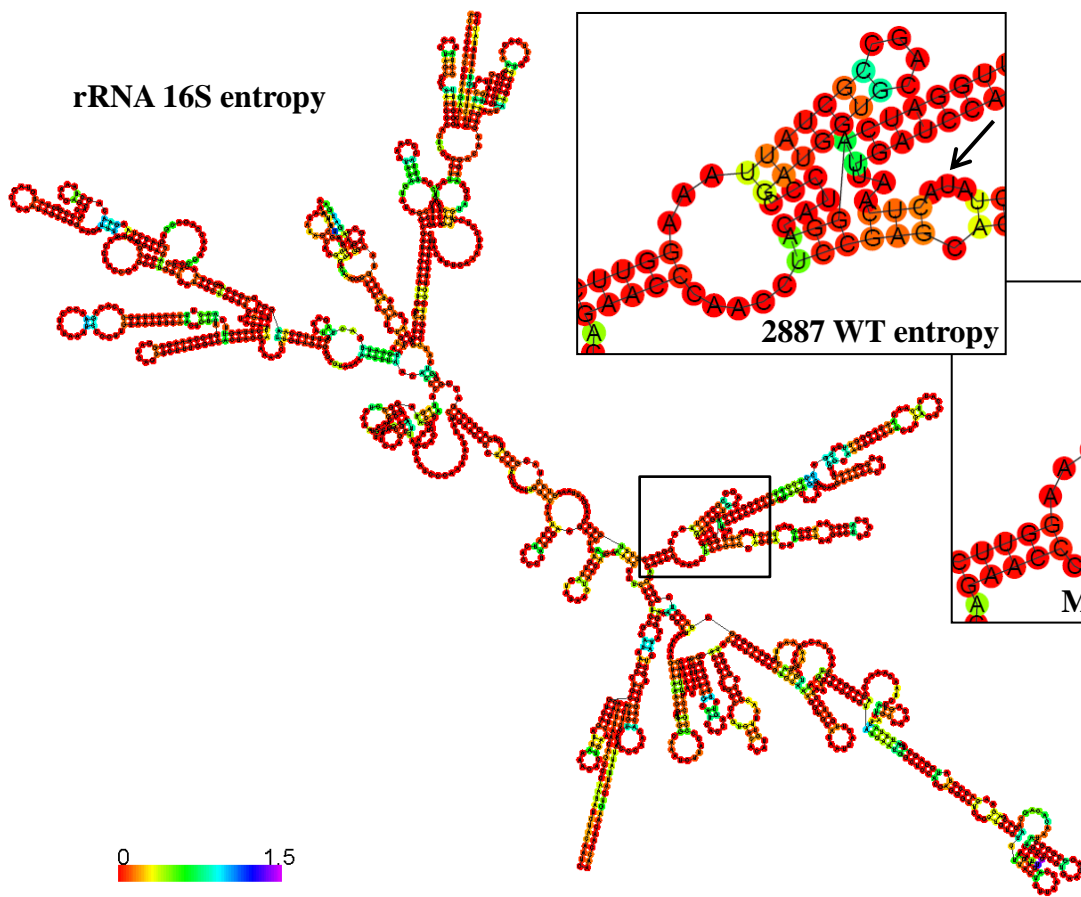

2887 WT entropy

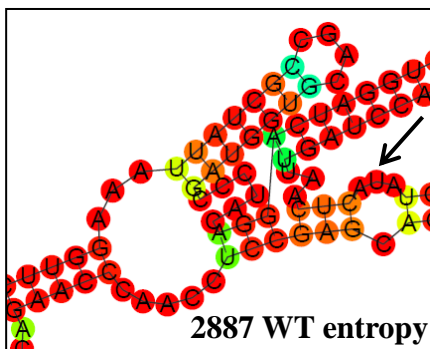

Mutation 2887 entropy

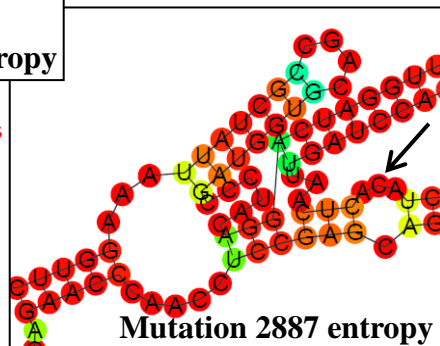



COXI

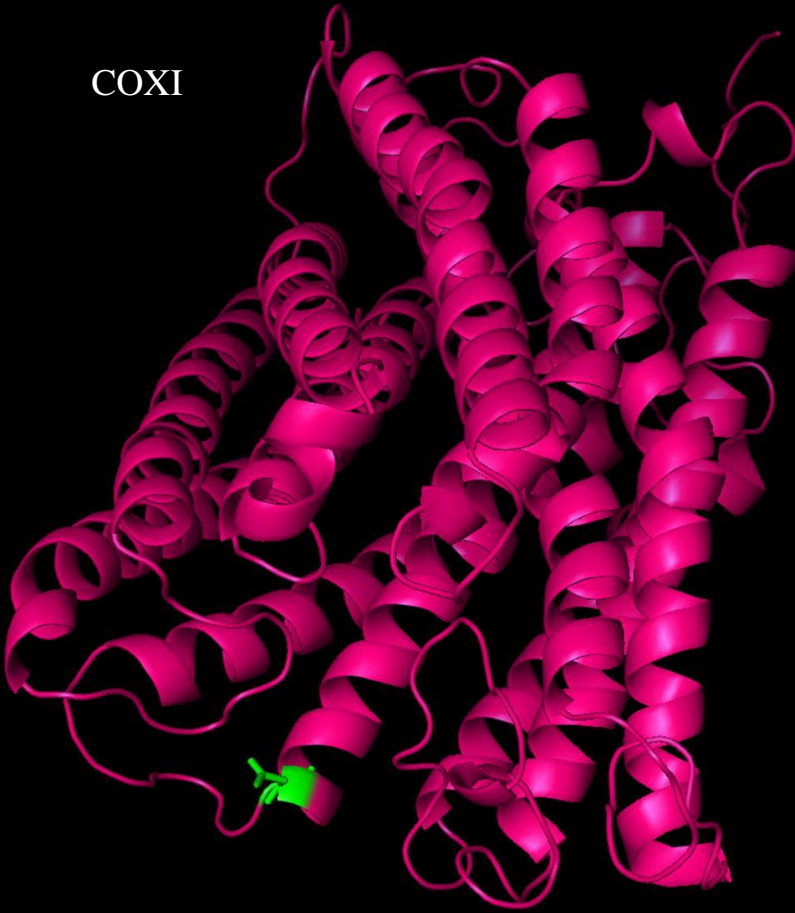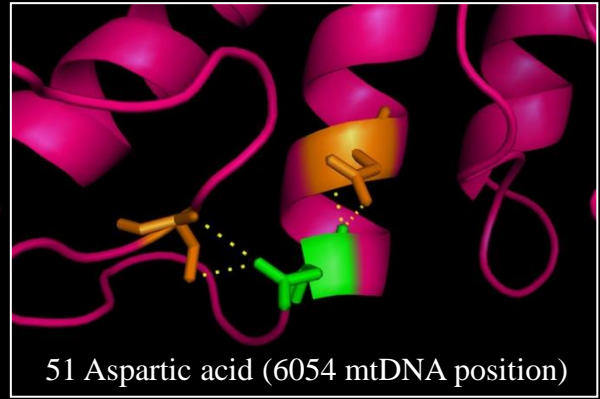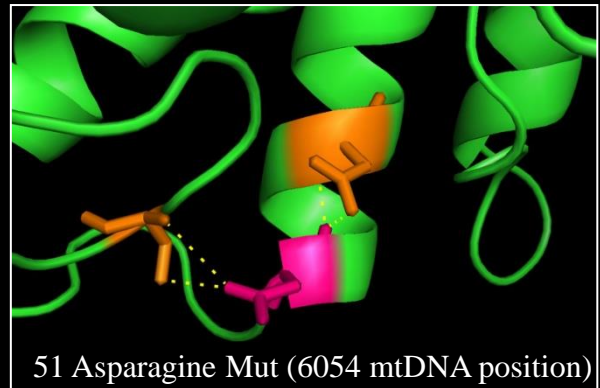

COXII

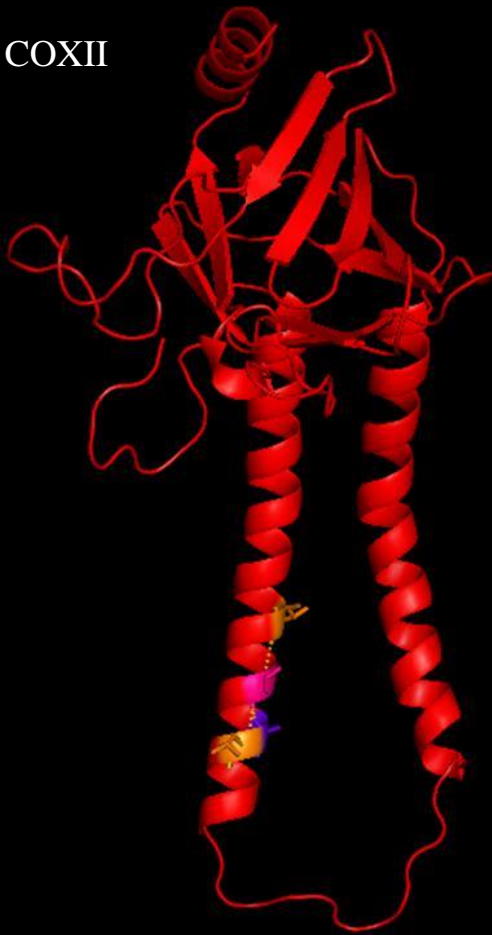

38 Valine (7697 mtDNA position)

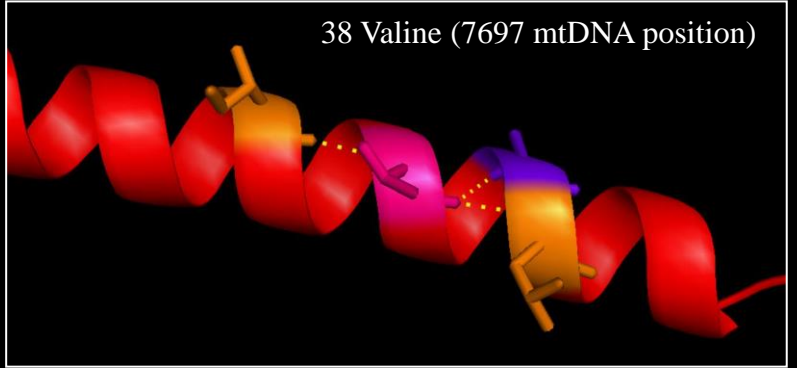

38 Isoleucine Mut (7697 mtDNA position)

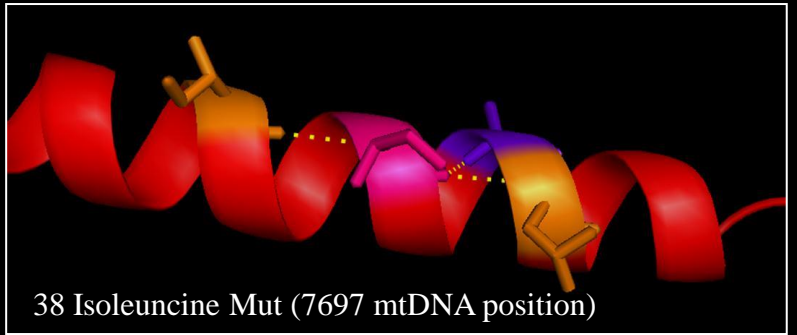

cyt B

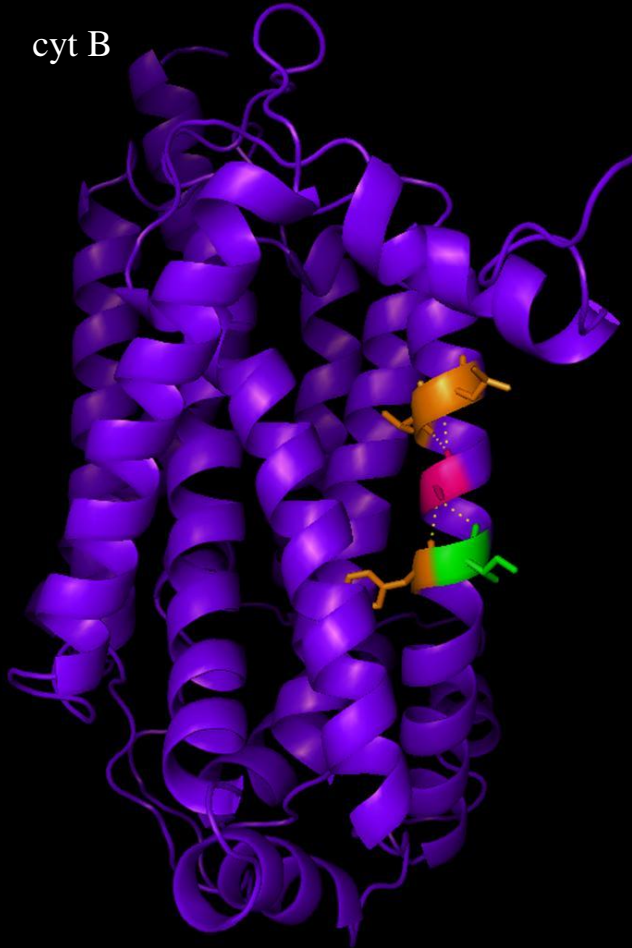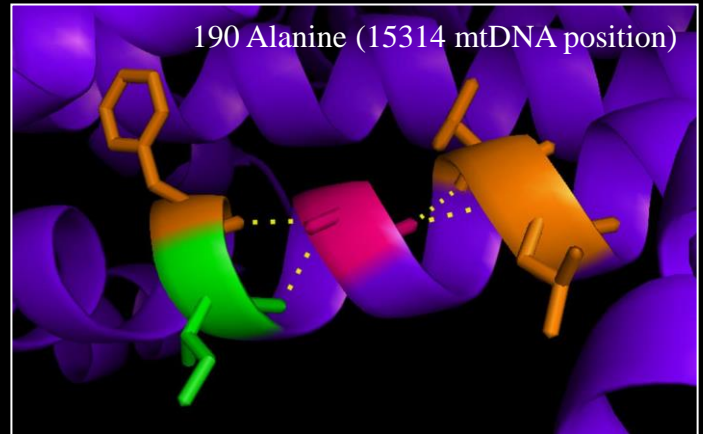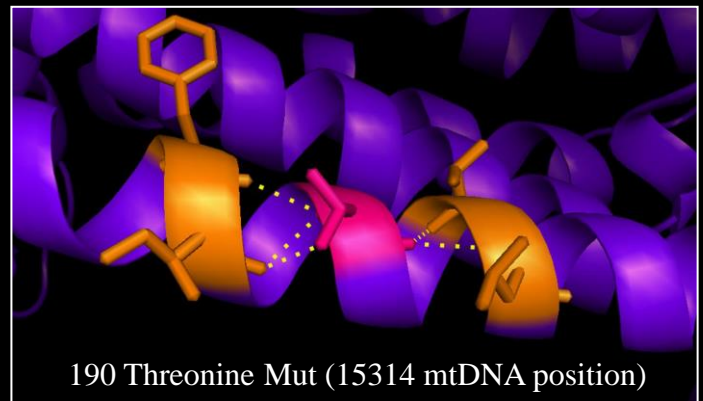

Supplement: pone.0074636.s002.pdf [file pone.0074636.s002.pdf]
