# Supplementary material for: Frequency and Pattern of Heteroplasmy in the Complete Human Mitochondrial Genome
Source: PLoS One. 2013 Oct 2;8(10):e74636. doi: 10.1371/journal.pone.0074636 (PMC3788774; doi:10.1371/journal.pone.0074636)
Supplement: Table S3 — Complete results of each heteroplasmic position analyzed (map locus, position, sample name, heteroplasmy type, heteroplasmy origin, mean proportion of height peaks, distribution in population database, number of hits in mtDNA phylogeny (PhyloTree.org) and by Soares et al. [39] , probability of mutation and nucleotide and amino acid Conservation Index). (XLSX) [file pone.0074636.s005.xlsx]

## Sheet: Hoja2
Supplementary Table S3.Complete results of each heteroplasmic position analyzed (map locus, position, sample name, heteroplasmy type, heteroplasmy origin, mean proportion of height peaks, distribution in population database, number of hits in mtDNA phylogeny (PhyloTree.org) and by Soares et al. [39], probability of mutation and nucleotide and amino acid Conservation Index).
Map Locus	Position	Sample name	Het	CRS	Mean proportion heigth peaks	Distribution in population database	No. Hits phylogeny (PhyloTree.org)	No. Hits Soares et al. [39]	Probability of mutation	Nucleotide Conservation Index (%)	Amino acid change	Aa Conservation Index (%)
CRa	93	Z241	G/a	A	84.51G 15.49A	GAP:0.1, A:96.3, G:3.6	11	19	0.00177853	A:34.04, C:6.38, G:29.79, T:29.79	-	-
CRb	64	Ir28	T/c	C	87T 13C	C:96.8, T:3.1, GAP:0.1	10	22	0.00205935	C:12.77, G:8.51, T:78.72	-	-
CRb	146	Ir17	T/c	T	90T 10C	T:81.4, C:18.4, A:0.2, GAP:0.1	66	109	0.0102031	A:27.66, C:42.55, T:29.79	-	-
CRb	146	G65	T/c	T	80T 20C	T:81.4, C:18.4, A:0.2, GAP:0.1	66	109	0.0102031	A:27.66, C:42.55, T:29.79	-	-
CRb	150	Arm17	C/t	C	88C 12T	C:88.2, T:11.7, G:0.1, GAP:0.1	41	63	0.00589722	A:19.15, C:42.55, G:27.66, T:10.64	-	-
CRb	152	Ir11	T/c	T	89T 11C	T:70.3, C:29.6, GAP:0.1	117	157	0.0146962	A:17.03, C:48.93, T:34.04	-	-
CRa	152	Z217	T/c	T	66.74T 33.26C	GAP:0.1, C:29.6, T:70.3	117	157	0.0146962	A:17.03, C:48.93, T:34.04	-	-
CRa	152	Z269	T/c	T	87T 13C	GAP:0.1, C:29.6, T:70.3	117	157	0.0146962	A:17.03, C:48.93, T:34.04	-	-
CRb	195	G67	T/c	T	90T 10C	GAP:0.1, T:73.7; C:25.8, A:0.4	71	98	0.00917345	A:31.91, C:38.30, G:8.51, T:21.28	-	-
CRb	203	Az5	A/g	G	66A 34G	G:99.7, A:0.3, GAP:0.1	2	6	0.00056164	A:53.19, C:2.13, G:34.04, T:10.64	-	-
CRb	204	Arm17	T/c	T	89T 11C	T:93.4, C:6.5, A:0.1, GAP:0.1	23	43	0.00402509	A:8.51, C:17.02, G:53.19, T:21.28	-	-
CRa	234	Z247	G/a	A	83.45G 16.55A	GAP:0.1, A:99.4, G:0.5	8	43	0.00402509	GAP:8.51, A:76.60, C:2.13, G:6.38, T:6.38	-	-
CRa	189	Z141	A/g	A	85.145T 14.855C	GAP:0.1, A:91, C:1.8, G:7.1	19	31	0.00290181	GAP:2.13, A:57.44, C:10.64, G:29.79	-	-
tRNA phea	593	Z038	T/c	T	91.77T 8.23C	C:0.6, T:99.4	4	11	0.00102967	GAP:85.57, A:4.43, C:3.29, G:0.87, T:5.84	-	-
12Sb	1552	Ir54	G/a	G	87G 13A	G:100	0	0	0	GAP:0.47, A:11.88, C:3.09, G:73.29, T:11.28	-	-
16Sa	2887	Z090	T/c	T	91.95T 8.05C	T: 99.8, C:0.2	2	2	0.000187213	GAP:0.6, A:20.07, C:20, G:39.13, T:20.2	-	-
16Sb	3014	Az10	G/t	G	86G 14T	G:100	0	0	0	GAP:0.07, A:0.81, G:99.13	-	-
ND1b	3492	Arm25	A/c	A	65A 35C	A:100	0	1	9.36067e-05	A:44.77, C:40.13, G:5.97, T:9.13	NS (Lys->Asn)	A:0.1, F:0.3, G:0.1, H:1.2, I:0.1, K:6.2, L:1.5, P:0.1, Q:2.1, R:85.2, S:0.3, W:0.3, Y:2.7
ND1b	3492	G20	A/c	A	78A 22C	A:100	0	1	9.36067e-05	A:44.77, C:40.13, G:5.97, T:9.13	NS (Lys->Asn)	A:0.1, F:0.3, G:0.1, H:1.2, I:0.1, K:6.2, L:1.5, P:0.1, Q:2.1, R:85.2, S:0.3, W:0.3, Y:2.7
ND1b	3532	Az14	A/g	A	82A 18G	A:100	0	0	0	A:85.23, C:1.01, G:13.42, T:0.34	NS (Thr->Ala)	A:5.1, F:0.1, G:0.1, I:31.5, L:1.1, M:33, S:0.1, T:20.5, V:8.5
ND1a	3729	Z273	A/g	A	88.68A 11.32G	A:99.9, G:0.1	1	1	9.36067e-05	A:47.99, C:33.76, G:4.23, T:14.03	S (Ser)	S:100
ND1a	4055	Z031	T/c	T	90.38T 9.62C	T:100	0	0	0	GAP:1.07, A:27.52, C:42.42, G:2.82, T:26.17	NS (Leu->Pro)	GAP:0.3, A:7.7, C:0.5, D:0.8, E:0.3, F:2.7, G:1.1, H:7.5, I:2.7, K:0.2, L:16.4, M:4.4, N:9.5, P:5.1, Q:1.8, R:0.1, S:11.5, T:17.9, V:0.6, W:0.1, Y:8.8
ND2b	4991	Az4	G/a	G	65G 35A	G:99.3, A:0.7	4	6	0.00056164	A:78.86, C:1.74, G:18.86, T:0.54	S (Gln)	E:0.1, H:2.5, L:0.2, N:0.1, Q:97.2
ND2a	5306	Z225	C/t	C	54.42C 45.58T	C:100	0	0	0	A:31.61, C:51.68, G:1.54, T:15.17	S (Pro)	A:79, F:0.1, G:0.4, I:0.2, L:0.2, M:0.1, P:15.9, S:2.2, T:1.8, V:0.3
ND2b	5460	Az7	A/g	G	68A 32G	G:92.8, A:7.2	22	36	0.00336984	A:62.08, C:3.62, G:21.88, T:12.42	NS (Ala->Thr)	A:5.5, C:0.3, F:0.1, I:22.8, L:1.8, M:11, N:0.2, P:2.7, S:10.8, T:27.1, V:17.6, Y:0.2
COX1a	6054	Z248	G/a	G	78.75G 21.25A	G:100	0	0	0	GAP:0.2, A:0.07, G:99.66, T:0.07	NS (Asp->Asn)	D:99.8, G:0.1, N:0.1, Y:0.1
COX2a	7697	Z251	A/g	G	75.55A 24.45G	G:99.8, A:0.2	2	1	9.36067e-05	GAP:0.07, A:5.3, C:1.81, G:92.48, T:0.34	NS (Val->Ile)	GAP:0.1, G:0.1, I:4.3, V:95.6
COX2b	7754	T186	A/g	G	89A 11G	G:100	0	1	9.36067e-05	GAP:0.07, A:5.97, C:0.13, G:93.83	NS(Asp->Asn)	GAP:0.1, D:92.9, E:2.8, G:0.1, N:3.9, Q:0.1, S:0.1
COX2a	7912	Z024	A/g	G	75.64A 24.36G	G:99.9, A:0.1	3	4	0.000374427	GAP:0.07, A:65.91, C:1.34, G:32.08, T:0.6	S (Glu)	GAP:0.1, D:0.1, E:99.7, K:0.1, Q:0.1, V:0.1
COX2b	8152	Az46	G/a	G	88G 13A	G:98.8, A:1.2	2	5	0.000468033	GAP:0.07, A:52.15, C:20.27, G:4.83, T:22.68	S (Pro)	GAP:0.1, A:0.4, H:0.1, L:0.1, N:0.2, P:95.1, Q:0.1, S:0.9, T:1.8, V:1.3
tRNA lysa	8307	Z176	A/g	A	66.325A 33.675G	A:100	0	0	0	GAP:22.89, A:63.29, C:0.47, G:1.95, T:11.41	-	-
ATP6/ATP8b	8551	Ir30	C/t	T	54C 46T	T:99.9, C:0.1	0	4	0.000374427	GAP:0.13, A:2.95, C:35.84, G:0.2, T:60.87/A:2.01, C:84.77, G:0.54, T:12.68	S (His)	A:0.1, F:0.1, H:21.3, I:15.7, L:53.6, M:4.3, N:0.1, Q:0.1, S:0.2, T:0.4, V:4.2/GAP:77.P418, H:4.2, L:15.9, N:0.8, P:0.7, S:0.5, Y:0.2
ATP6a	8603	Z223	T/c	T	87.95T 12.05C	T:99.9, C:0.1	1	1	9.36067e-05	A:0.4, C:3.89, G:0.2, T:95.5	NS (Phe->Ser)	GAP:0.1, A:1.6, C:0.1, D:0.1, F:28.7, I:5.0, L:55.8, M:4.2, P:0.1, S:0.5, T:1.6, V:1.6, W:0.1, Y:0.4
ATP6a	8577	Z229	G/a	A	59.51G 40.49A	A:99.8, G:0.2	0	3	0.00028082	GAP:0.4, A:11.28, C:44.97, G:3.69, T:39.66	S (Leu)	GAP:0.4, A:0.3, F:0.8, I:64.4, L:17.4, M:2.8, N:0.1, Q:0.6, T:1.0, V:12.2
ATP6b	8743	Ir29	G/a	G	68G 32A	G:99.9, A:0.1	0	1	9.36067e-05	A:67.05, C:1.74, G:27.72, T:3.49	NS (Val->Met)	GAP:0.1, A:21.5, C:0.6, F:0.1, I:8.7, L:2.8, M:16.1, S:2.3, T:43, V:4.9
ATP6a	9029	Z340	G/a	A	84.6G 15.4A	A:100	0	0	0	A:100	NS (His->Arg)	D:0.1, H:99.8, Q:0.1, Y:0.1
COX3a	9449	Snb61	T/c	C	16.26T 83.73C	C:98.6, T:1.4	4	6	0.00056164	A:0.2, C:56.85, T:42.95	S (Tyr)	C:0.2, F:1.8, H:0.1, I:0.1, L:0.3, M:0.1, W:0.5, Y:97
ND3b	10208	Ir10	C/t	T	89C 11T	T:99.9, C:0.1	1	2	0.000187213	A:39.06, C:34.03, G:2.48, T:24.43	S (Pro)	I:0.1, P:99.7, Q:0.1, T:0.1
tRNA argb	10427	Az39	G/a	G	85G 15A	G:99.8, A:0.2	1	2	0.000187213	A:59.87, C:26.04, G:1.95, T:12.15	-	-
ND4a	11016	Snb61	G/a	G	82.82G 17.18A	G:99.3, A:0.7	8	9	0.00084246	A:47.79, C:40.2, G:0.74, T:11.28	NS (Ser->Asn)	A:1.8, C:0.1, D:0.3, E:1.1, F:0.2, G:0.3, H:10.6, I:0.2, K:20.2, L:8.3, M:1.7, N:7.8, P:19.5, Q:6.5, R:0.3, S:10.6, T:8.8, V:0.6, Y:1
ND4b	11253	G1	C/t	T	76C 24T	T:99.6, C:0.4	2	5	0.000468033	GAP:0.07, C:5.03, G:0.07, T:94.83	NS (Ile->Thr)	A:0.1, F:0.2, I:7.8, L:80.4, M:3, S:2.1, T:3, V:3.4
ND4b	11692	G38	A/c	C	76A 24C	C:100	0	1	9.36067e-05	GAP:0.07, A:48.46, C:16.91, G:23.56, T:11.01	S (Gly)	A:0.3, G:99.5, S:0.3
ND4b	11809	G82	T/c	T	78T 22C	T:99.8, C:0.2	1	0	0	GAP:0.07, A:48.46, C:21.81, G:14.16, T:15.5	S (Thr)	A:3.9, C:0.1, F:0.1, G:0.2, I:8.8, K:0.3, L:6.9, M:36.8, N:2.6, P:9.1, S:2, T:21.8, V:7.4, W:0.1
ND5b	12654	Arm37	A/g	A	86A 14G	A:99.7, G:0.3	4	3	0.00028082	A:80.87, C:0.54, G:18.39, T:0.2	S (Trp)	A:0.1, H:0.1, K:0.1, L:0.1, Q:0.8, S:0.6, W:97.9, Y:0.4
ND5a	12948	Z226	A/g	A	91.13A 8.87G	A:99.5, G:0.5	1	1	9.36067e-05	GAP:0.81, A:17.38, C:44.56, G:3.22, T:34.03	S( Leu)	GAP:1.6, A:9.4, C:0.8, D:0.1, E:1.1, F:0.4, G:0.1, H:1.3, I:4.6, L:35.5, M:2.5, N:3, P:6.8, Q:3.5, S:9.4, T:17.9, V:1.4, Y:0.6
ND5b	13368	Arm19	G/a	G	54G 45A	G:96.5, A:3.5	8	8	0.000748853	A:30.27, C:42.42, G:17.65, T:9.66	S (Gly)	A:0.1, G:99.9
ND5a	13590	Snb48	G/a	G	62.11G 37.89A	G:93.6, A:6.4	6	6	0.00056164	A:16.24, C:52.95, G:1.14, T:29.66	S (Leu)	A:0.1, C:0.2, F:73.6, I:0.1, L:17.1, M:8.9, T:0.1, V:0.1
ND5b	13604	Ir43	G/a	G	90G 10A	G:100	0	0	0	A:0.54, C:6.04, G:93.42	NS (Ser->Asn)	G:0.1, N:0.5, S:95.3, T:4.1
ND5a	13812	Snb78	T/c	T	76.63T 23.37C	T:99.9, C:0.1	1	2	0.000187213	A:44.03, C:30.4, G:6.58, T:18.99	S (Ala)	A:19, C:0.7, F:1.4, G:0.8, I:22.8, L:23.8, M:10.3, N:0.1, Q:0.1, S:2.2, T:13.8, V:4.7, Y:0.3
ND6b	14527	G25	A/g	A	89A 11G	A:99.9, G:0.1	1	3	0.00028082	A:65.5, C:13.15, G:10, T:11.34	S (Gly)	A:3.1, C:0.6, F:0.2, G:2.1, H:0.4, I:0.3, L:0.4, M:0.1, N:0.1, P:9.5, Q:0.1, S:72.7, T:8.7, V:1.3, Y:0.3
ND6b	14561	T9	A/g	A	78A 22G	A:100	0	0	0	A:77.25, C:8.79, G:13.76, T:0.2	NS (Asp->Gly)	A:10.2, C:3.3, D:0.1, F:8.2, G:4.1, I:3.9, L:12.3, M:11.6, S:3.9, T:0.7, V:41.6
CytBb	14770	Az14	T/c	C	55T 45C	C:99.9, T:0.1	1	1	9.36067e-05	A:0.27, C:83.42, G:2.95, T:13.36	S (Asn)	GAP:0.2, E:0.1, H:93.2, I:0.1, K:0.1, L:0.1, M:0.3, N:3.2, P:0.1, Q:2.1, R:0.1, S:0.1, T:0.1, V:0.1, X:0.1, Y:0.2
CytBb	15046	T186	G/a	A	74G 26A	A:99.9, G:0.1	0	1	9.36067e-05	A:77.11, C:8.12, G:8.05, T:6.71	S (Arg)	A:0.1, L:0.1, R:99.7, W:0.1
CytBa	15244	Snb61	G/a	A	71.74G 28.26A	A:98.5, G:1.5	7	16	0.00149771	A:27.72, C:24.77, G:31.74, T:15.77	S (Gly)	G:99.9, R:0.1
CytBb	15314	Arm20	G/a	G	84G 16A	G:99.3, A:0.7	6	12	0.00112328	A:18.66, C:4.56, G:71.07, T:5.7	NS (Ala->Thr)	A:61.4, F:0.2, I:5.3, L:7.7, M:4, S:3.7, T:9.9, V:7.9
CytBa	15496	Z141	G/a	A	86.21G 13.79A	A:99.9, G:0.1	1	2	0.000187213	A:66.98, C:10, G:9.66, T:13.36	S (Leu)	GAP:0.1, F:2.6, L:96.7, M:0.4, P:0.1, V:0.1, Y:0.1
tRNA thra	15908	Z176	T/c	T	73T 27C	T:99.9, C:0.1	1	2	0.000187213	GAP:1.81, A:80.94, C:0.2, G:0.27, T:16.78	-	-
tRNA proa	15986	Snb19	G/a	G	58.5G 41.5A	G:100	0	0	0	GAP:0.13, A:50.34, C:0.13, G:49.4	-	-
CRb	16093	Az49	C/t	T	91C 8T	T:98.8, C:1.2	36	79	0.00739493	GAP:4.3, A:21.3, C:4.3, G:6.4, T:63.8	-	-
CRa	16189	Snb48	T/c	T	91.31T 8.69C	GAP:0.1, A:0.1, C:59.6, T:40, G:0.2	66	90	0.0084246	GAP:2.13, A:19.15, C:40.42, G:8.51, T:29.79	-	-
CRa	16189	Z253	T/c	T	88.75T 11.25C	GAP:0.1, A:0.1, C:59.6, T:40, G:0.2	66	90	0.0084246	GAP:2.13, A:19.15, C:40.42, G:8.51, T:29.79	-	-
CRb	16217	T30	C/t	T	91C 9T	T:96.5, C:3.4, GAP:0.1	1	6	0.00056164	GAP:14.89, A:10.63, C:25.53, G:6.38, T:42.55	-	-
CRb	16223	G73	T/c	C	89T 11C	T:51.9, C:48, GAP:0.1	22*	37	0.00346345	GAP:8.51, A:23.40, C:44.68, T:23.41	-	-
CRb	16223	Arm20	T/c	C	89T 11C	T:51.9, C:48, GAP:0.1	22	37	0.00346345	GAP:8.51, A:23.40, C:44.68, T:23.41	-	-
CRa	16293	Snb22	A/g	A	79A 21G	A:96.5, C:0.2, T:3, G:0.3	8	17	0.00159131	A:51.06, C:19.15, G:4.26, T:25.53	-	-
CRb	16362	G67	T/c	T	87T 13C	T:77.6, C:22.3, A:0.1	48	67	0.00627165	A:25.53, C:19.15, T:55.32	-	-
a Heteroplasmic positions detected in present study
b Heteroplasmic positions reported by Li et al. [18]
